# Supplementary material for: Characterization of the Products of the Catalytic Pyrolysis of Discarded COVID-19 Masks over Sepiolite
Source: MDPI journal article supplement (doi:10.3390/app13053188), 2023-03-02
Supplement: s1 [file s1]

## SUPPLEMENTARY MATERIAL

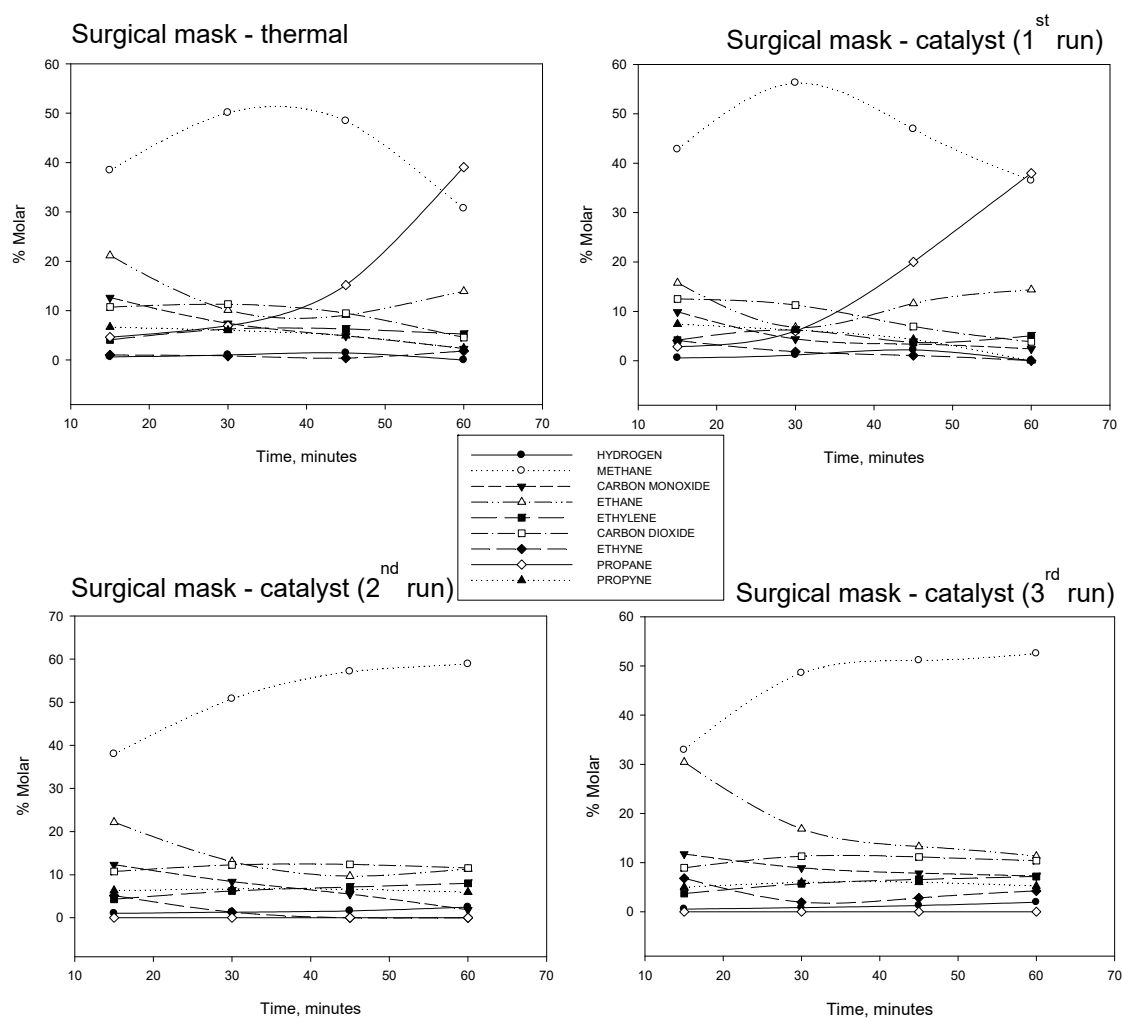

**Figure S1:** Syngas component yield in catalytic pyrolysis of surgical masks.

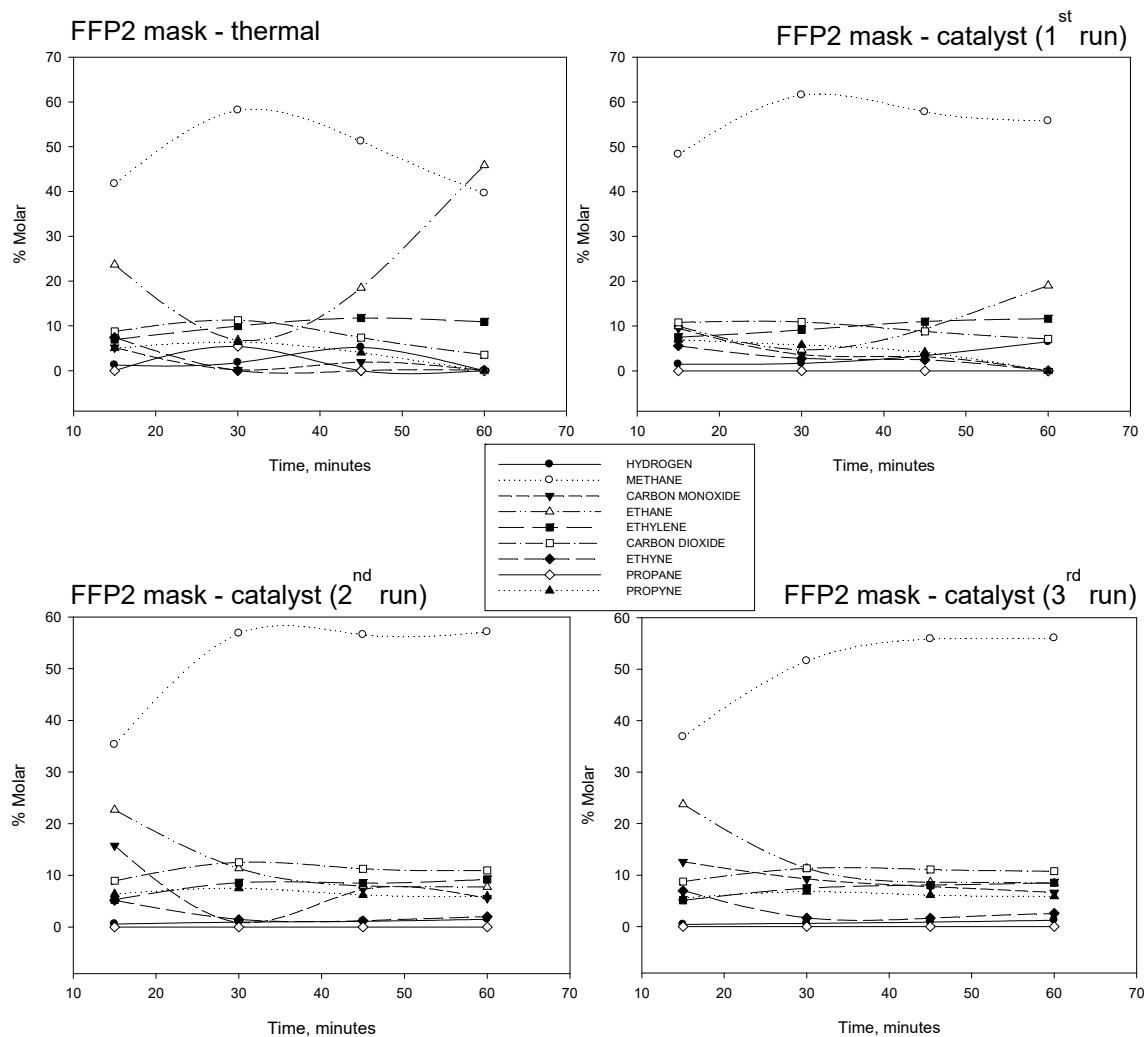

**Figure S2:** Syngas component yield in catalytic pyrolysis of FFP2 masks.
